# Supplementary material for: Stimulus-responsive non-ionic diblock copolymers: protonation of a tertiary amine end-group induces vesicle-to-worm or vesicle-to-sphere transitions
Source: Royal Society of Chemistry journal article supplement (doi:10.1039/c6py01076h), 2016-07-21
Supplement: c6py01076h1.pdf [file c6py01076h1.pdf]

## Supporting information for:

### Stimulus-responsive non-ionic diblock copolymers: protonation of a tertiary amine end-group induces vesicle-to-worm or vesicle-to-sphere transitions

Nicholas J. W. Penfold,<sup>a</sup> Joseph R. Lovett,<sup>a</sup> Pierre Verstraete,<sup>b</sup> Johan Smets<sup>b</sup> and Steven P. Armes<sup>a</sup>

<sup>a</sup>Department of Chemistry, University of Sheffield, Brook Hill, Sheffield, South Yorkshire, S3 7HF

<sup>b</sup>Procter & Gamble, Eurocor NV/SA, Temselaan 100, 1853 Strombeek-Bever, Belgium

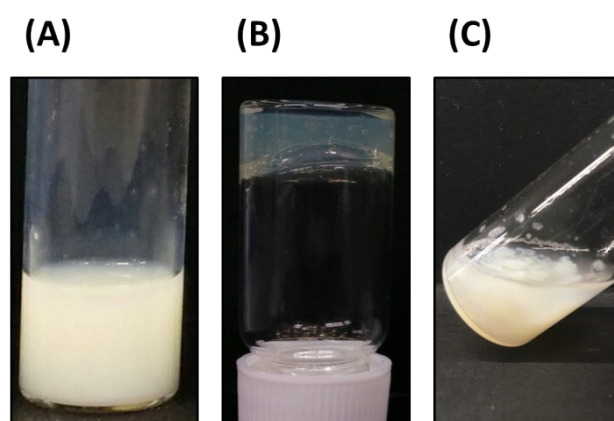

**Figure S1.** Digital photographs recorded for 10% w/w aqueous dispersions of MPETTC-PGMA<sub>43</sub>-PHPMA<sub>190</sub> diblock copolymer nano-objects at 20 °C and (A) pH 7.0, (B) pH 3.0 and (C) after a pH switch from pH 7.0 to pH 3.0 and returning to pH 7.0.

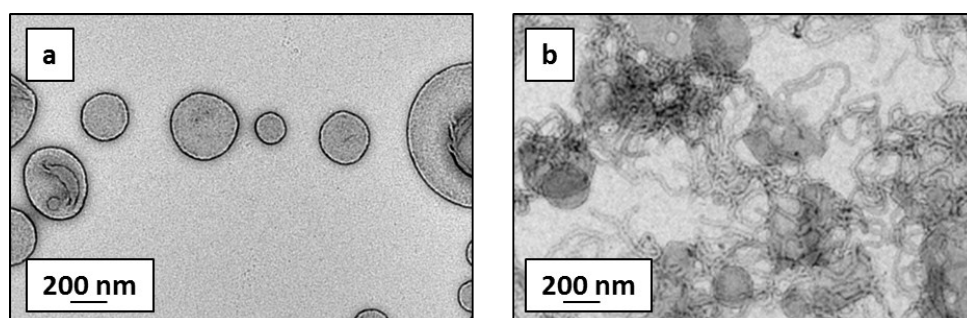

**Figure S2.** Representative TEM images obtained for an MPETTC-PGMA<sub>43</sub>-PHPMA<sub>210</sub> diblock copolymer at (a) pH 7.0 and (b) pH 3.0.

(A)

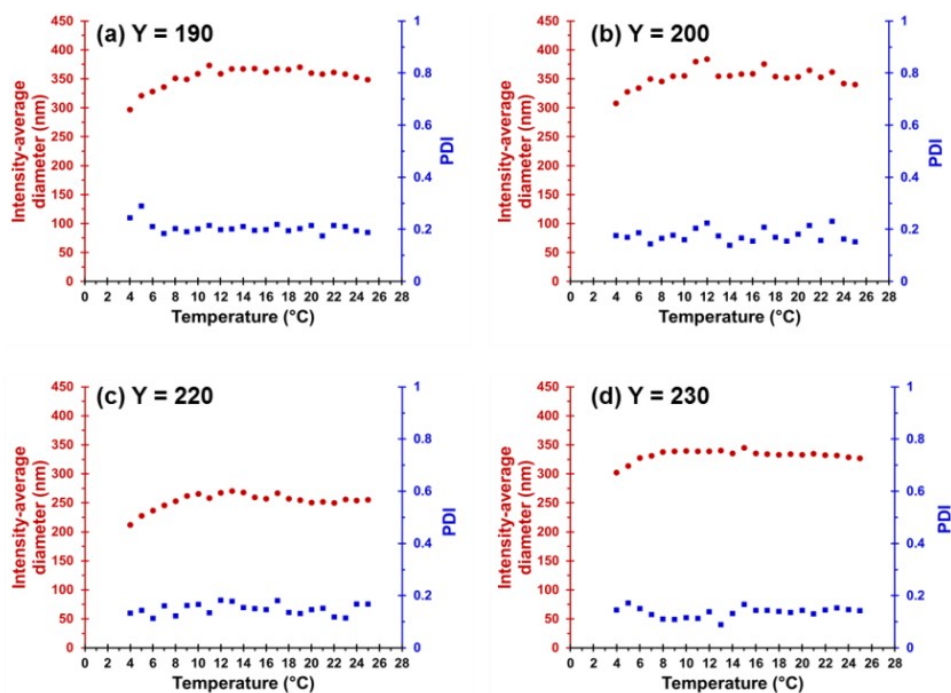

(B)

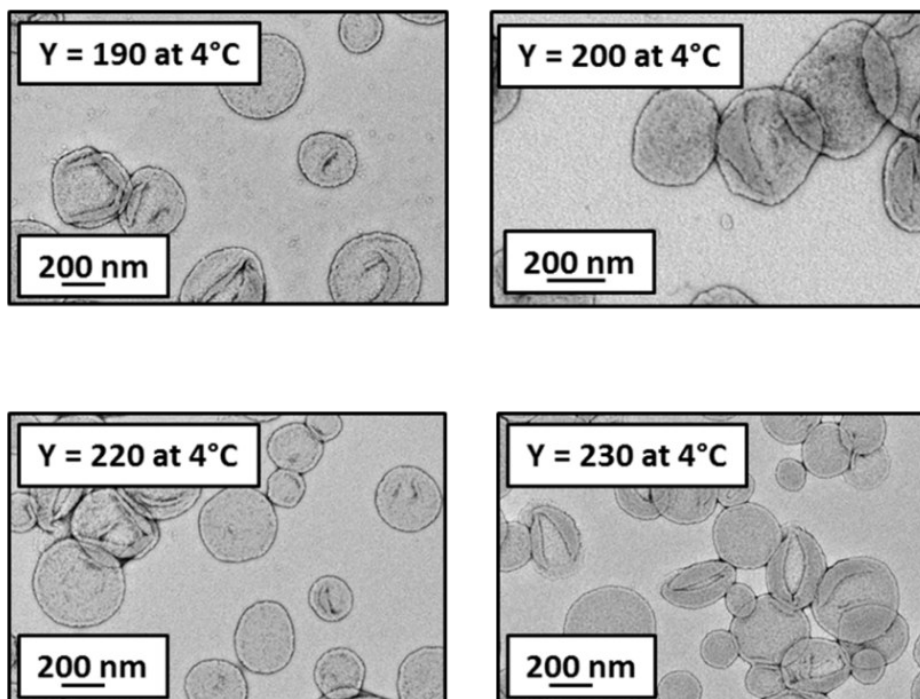

**Figure S3.** (A) Variation of intensity-average diameter (and polydispersity index) with temperature on cooling a 0.1% w/w dispersion of MPETTC-PGMA<sub>43</sub>-PHPMA <sub>$y$</sub>  diblock copolymer vesicles at pH 7.0 from 20 °C to 4 °C and (B) the corresponding TEM images obtained after this temperature sweep for  $y$  values of 190, 200, 220 and 230.

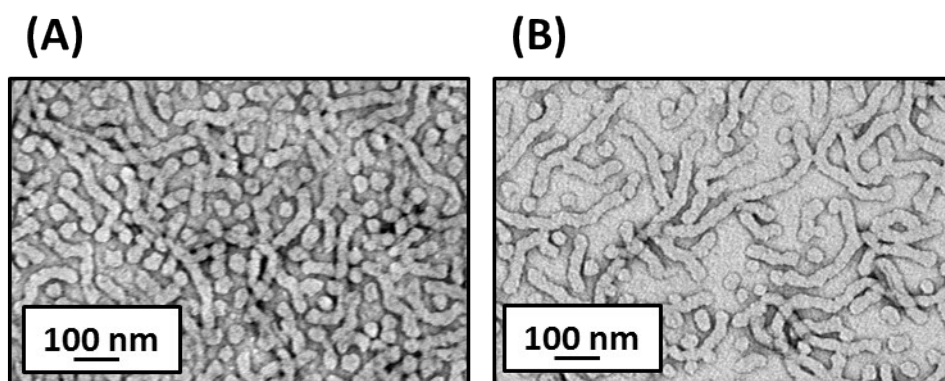

**Figure S4.** Representative TEM images obtained for MPETTC-PGMA<sub>43</sub>-PPHMA<sub>230</sub> diblock copolymer nano-objects at pH 3 after being stored in a 4 °C fridge for 24 h at (A) 0.1% w/w or (B) 10% w/w.

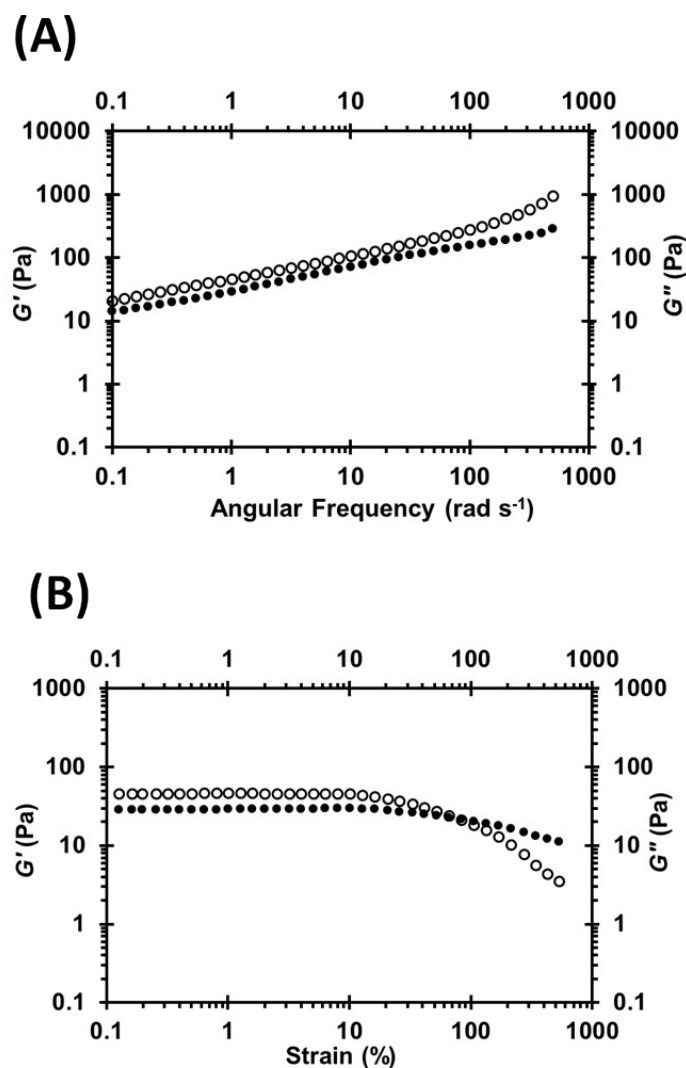

**Figure S5.** (A) Angular frequency sweeps conducted at 1.0% strain and (B) percentage strain sweeps conducted at 1.0 rad s<sup>-1</sup> for MPETTC-PGMA<sub>43</sub>-PPHMA<sub>190</sub> diblock copolymer worm gels at pH 3 and 20 °C. The open circles represent G' and the closed circles represent G''.

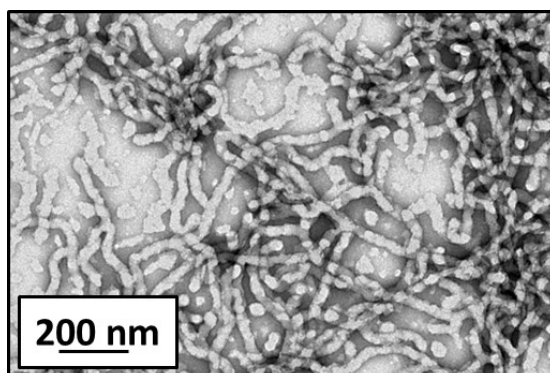

**Figure S6.** TEM image obtained for MPETTC-PGMA<sub>43</sub>-PPMA<sub>230</sub> diblock copolymer worms at pH 3 after a temperature cycle from 20 °C to 4 °C to 20 °C.
